# Supplementary material
Source: publisher figshare collection journal article supplement (https://asha.figshare.com/ndownloader/files/34457924)
Supplement: Supplementary file 1 [file 34457924]

**Supplemental Material S1.** For clinicians interested in further exploration of Bayes Theorem in this context the following formulae are provided.

Bayes Theorem:

$$\text{PRETEST ODDS} \times \text{LIKELIHOOD RATIO}_1 \times \text{LIKELIHOOD RATIO}_2 \times \text{LIKELIHOOD RATIO}_3 \times \text{LIKELIHOOD RATIO}_{\dots} = \text{POSTTEST ODDS}$$

To convert probability or prevalence to odds use the formula:

$$\text{ODDS} = \text{PROBABILITY} / (1 - \text{PROBABILITY})$$

To convert the posttest odds back to probability use the formula:

$$\text{PROBABILITY} = \text{ODDS} / (1 + \text{ODDS})$$

To calculate your own likelihood ratios for risk factors relevant to your specific population, the following formulae can be used if the sensitivity and specificity is known:

$$\text{Positive LR} = \text{SENSITIVITY} / (1 - \text{SPECIFICITY})$$

$$\text{Negative LR} = (1 - \text{SENSITIVITY}) / \text{SPECIFICITY}$$
